# Supplementary material for: Single-cell multi-omic analysis of the vestibular schwannoma ecosystem uncovers a nerve injury-like state
Source: PubMed Central journal article supplement (PMC10786875; doi:10.1038/s41467-023-42762-w), 2024-01-12
Supplement: 41467_2023_42762_MOESM1_ESM.pdf [file 41467_2023_42762_MOESM1_ESM.pdf]

## Supplementary Information

### Single-cell multi-omic analysis of the vestibular schwannoma ecosystem uncovers a nerve injury-like state

Thomas F. Barrett<sup>1†</sup>, Bhuvic Patel<sup>2†</sup>, Saad M. Khan<sup>3,4Ψ</sup>, Riley D.Z. Mullins<sup>1,5Ψ</sup>, Aldrin K.Y. Yim<sup>5</sup>, Sangami Pugazenthi<sup>2</sup>, Tatenda Mahlokozera<sup>2</sup>, Gregory J. Zipfel<sup>2,6</sup>, Jacques A. Herzog<sup>1,6</sup>, Michael R. Chicoine<sup>7</sup>, Cameron C. Wick<sup>1,6</sup>, Nedim Durakovic<sup>1,6</sup>, Joshua W. Osbun<sup>2</sup>, Matthew Shew<sup>1,6</sup>, Alex D. Sweeney<sup>8</sup>, Akash J. Patel<sup>8,9,10</sup>, Craig A. Buchman<sup>1,6</sup>, Allegra A. Petti<sup>3,4\*</sup>, Sidharth V. Puram<sup>1,5,11\*</sup>, Albert H. Kim<sup>2,5,6\*</sup>

†ΨThese authors contributed equally to this work.

\*These authors jointly supervised the work.

<sup>1</sup>Department of Otolaryngology-Head and Neck Surgery, Washington University School of Medicine, St. Louis, MO, USA.

<sup>2</sup>Department of Neurological Surgery, Washington University School of Medicine, St. Louis, MO, USA.

<sup>3</sup>Department of Neurosurgery, Massachusetts General Hospital and Harvard Medical School, Boston, MA, USA.

<sup>4</sup>Brain Tumor Immunology and Immunotherapy Program, Department of Neurosurgery, Massachusetts General Hospital, Harvard Medical School, Boston, MA

<sup>5</sup>Department of Genetics, Washington University School of Medicine, St. Louis, MO, USA.

<sup>6</sup>Brain Tumor Center, Washington University School of Medicine/Siteman Cancer Center, St. Louis, MO, USA

<sup>7</sup>Department of Neurological Surgery, University of Missouri School of Medicine, Columbia, MA, USA.

<sup>8</sup>Department of Otolaryngology-Head and Neck Surgery, Baylor College of Medicine, Houston, TX, USA.

<sup>9</sup>Department of Neurosurgery, Baylor College of Medicine, Houston, TX, USA.

<sup>10</sup>Jan and Dan Duncan Neurological Research Institute, Texas Children's Hospital, Houston, TX, USA.

<sup>11</sup>Siteman Cancer Center, Washington University in St. Louis, St. Louis, MO, USA

**Supplementary Figure 1.** scRNA-seq data integration and VS TME classification by peripheral nerve signatures

**Supplementary Figure 2.** scATAC-seq quality control and cell type assignment.

**Supplementary Figure 3.** Supplementary VS-SC analysis

**Supplementary Figure 4.** Classification of cell states in stromal and immune cell populations.

**Supplementary Figure 5.** Classification of deconvolved bulk RNA expression data.

**Supplementary Figure 6.** Supplemental scATAC-seq and ligand-receptor analyses.

**Supplementary Figure 7.** Ligand-receptor networks and characterization of HSC cell lines.

**Supplementary Table 1.** scRNA-seq Patient Characteristics

**Supplementary Table 2.** NF2 mutations derived from WES analysis.

**Supplementary Table 3.** Number of cells of each cell type with/without chromosome 22q loss from all samples predicted to have chr22q loss by inferCNV and/or WES (SCH1, SCH2, SCH13, SCH20).

**Supplementary Table 4.** Number of cells of each Schwann cell subtype with/without chromosome 22q loss from all scRNA samples.

**Supplementary Table 5.** Bulk RNA-seq patient characteristics

**Supplementary Table 6.** CellBender Parameters

# Supplementary Figure 1

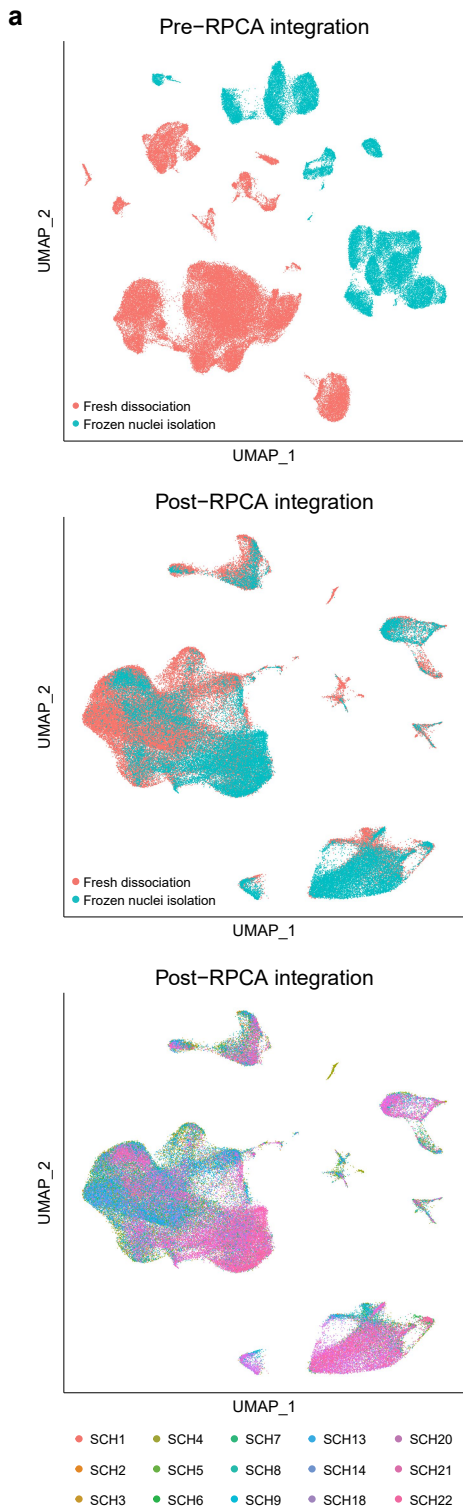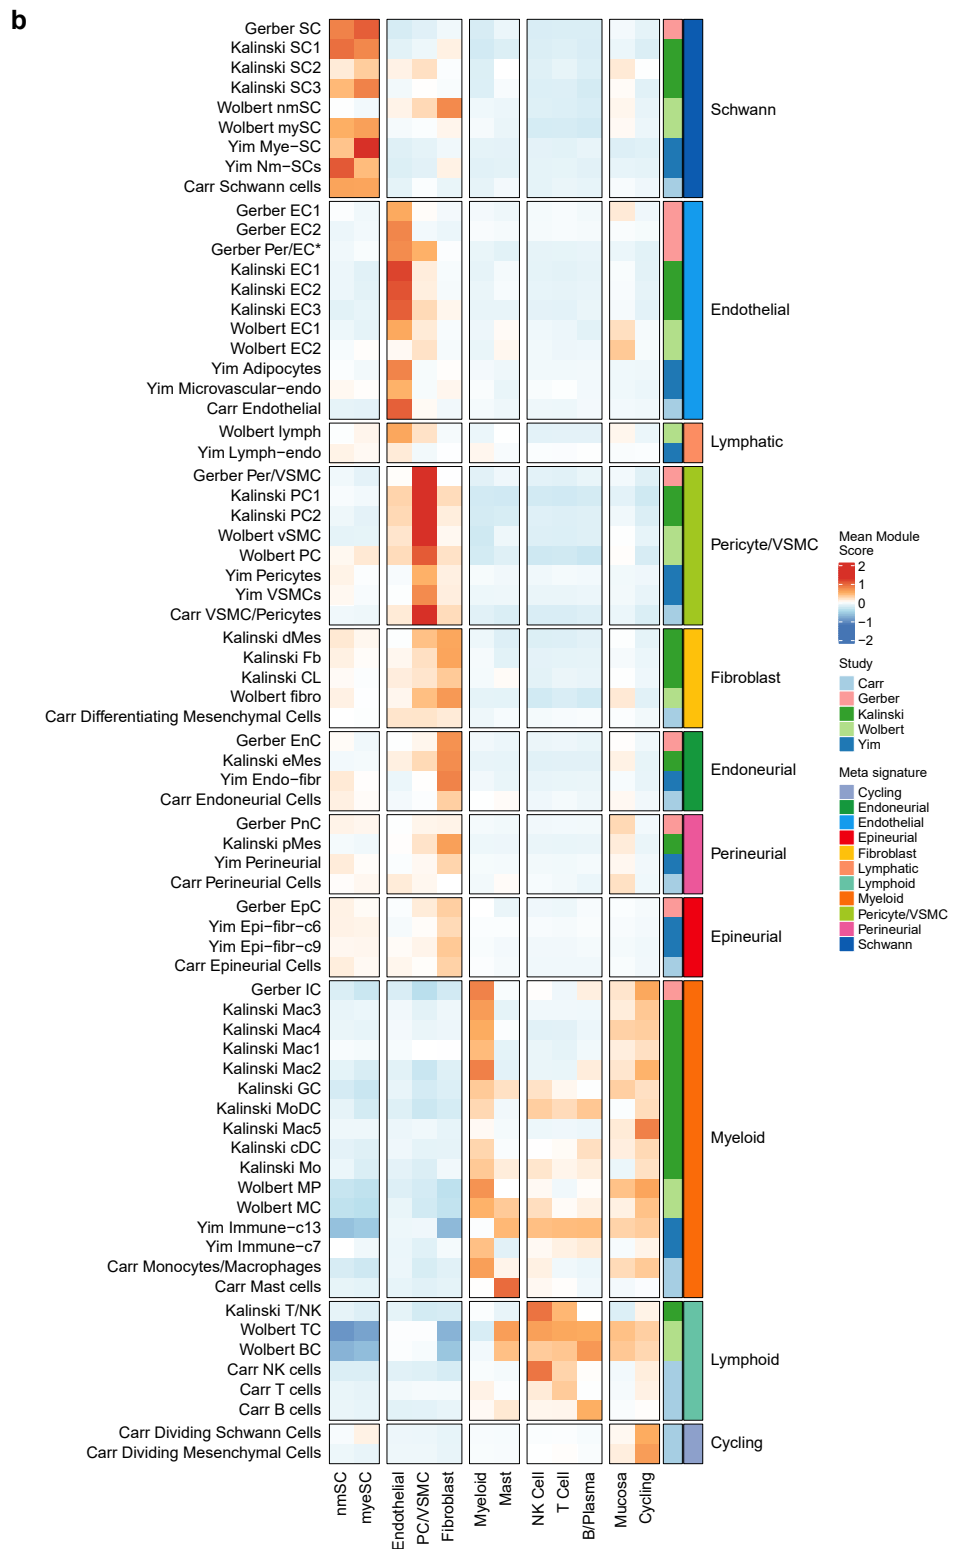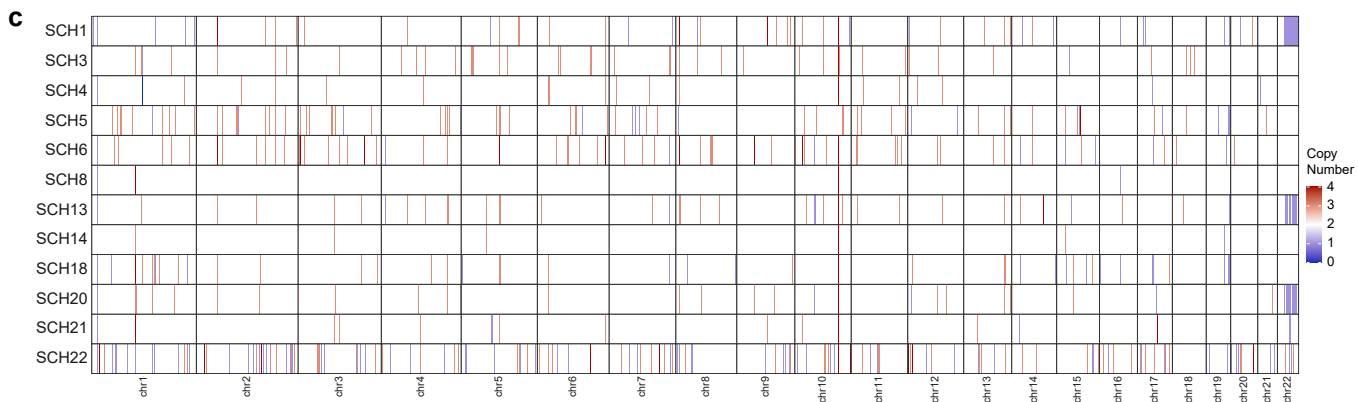

## Supplementary Figure 1. scRNA-seq data integration and VS TME classification by peripheral nerve signatures

- a. UMAP plot of VS scRNA-seq dataset of embeddings pre-RPCA integration (top), post-integration (middle), and colored by individual sample. Batch effects associated with fresh tissue dissociation and nuclei isolation are overcome.
- b. Heatmap showing average mouse peripheral nerve cell-type signature score (rows) for each VS cell-type cluster (columns).
- c. Heatmap showing segmental copy number alterations detected by whole exome sequencing of tumors.

# Supplementary Figure 2

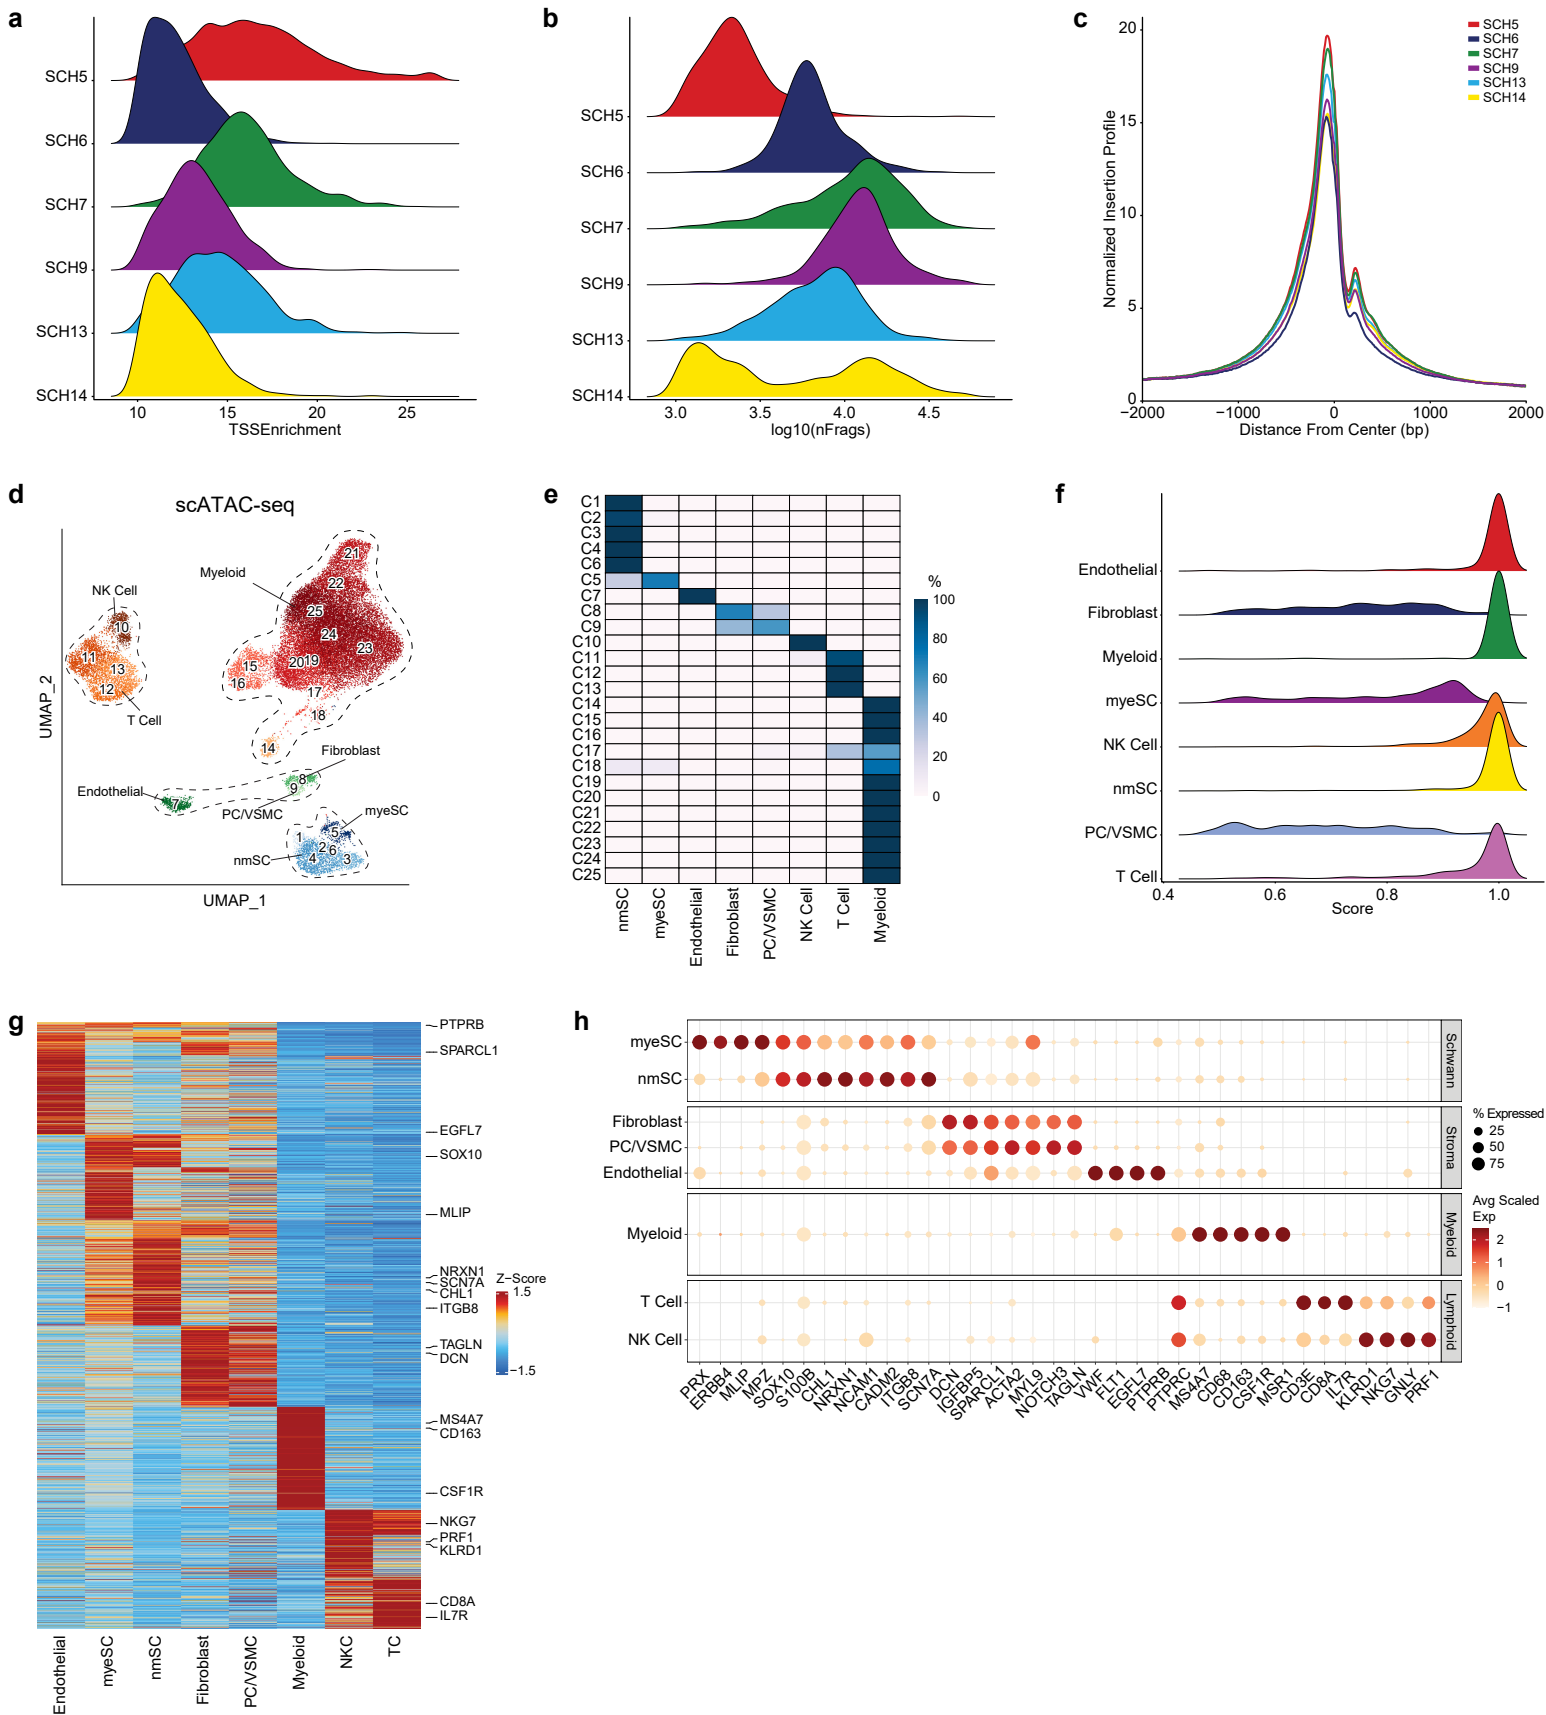

## Supplementary Figure 2. scATAC-seq quality control and cell type assignment.

- a. Ridgeplot showing distribution of TSS Enrichment for each tumor after preprocessing (removal of cells TSS Enrichment  $< 10$ , number of fragments  $< 1000$ , and doublet removal as detailed in text).
- b. Ridgeplot showing distribution of number of fragments per cell for each tumor after preprocessing.
- c. TSS enrichment profile for each sample shows clear peak in center with smaller shoulder peak to the right, consistent with a well-positioned +1 nucleosome and good quality ATAC-seq data.
- d. “Over-clustering” of scATAC-seq data at high resolution identifies 25 cell clusters which were initially labeled using inferred expression from gene accessibility of marker genes of various cell types. NK, natural killer cells; VSMC, vascular smooth muscle cells; nmSC, non-myelinating Schwann cells; myeSC, myelinating Schwann cells.
- e. Confusion matrix generated after unconstrained linkage of cells from the scRNA-seq dataset with cells in the scATAC-seq dataset. scATAC-seq cells in most clusters were overwhelmingly linked with just one type of scRNA-seq cell. scATAC-seq clusters were ultimately labeled with the identity of the scRNA-seq cell type that most cells in the cluster were linked to.
- f. Ridgeplot displaying distribution of score assigned to each scATAC-seq to scRNA-seq cell linkage by ArchR.
- g. Heatmap of marker genes for each cell cluster identified from inferred gene expression based on chromatin accessibility.
- h. Dot plot of expression levels of characteristic genes described in the literature for each VS cell subpopulation derived from expression data of scRNA-seq cells linked to scATAC-seq cells in each cluster.

# Supplementary Figure 3

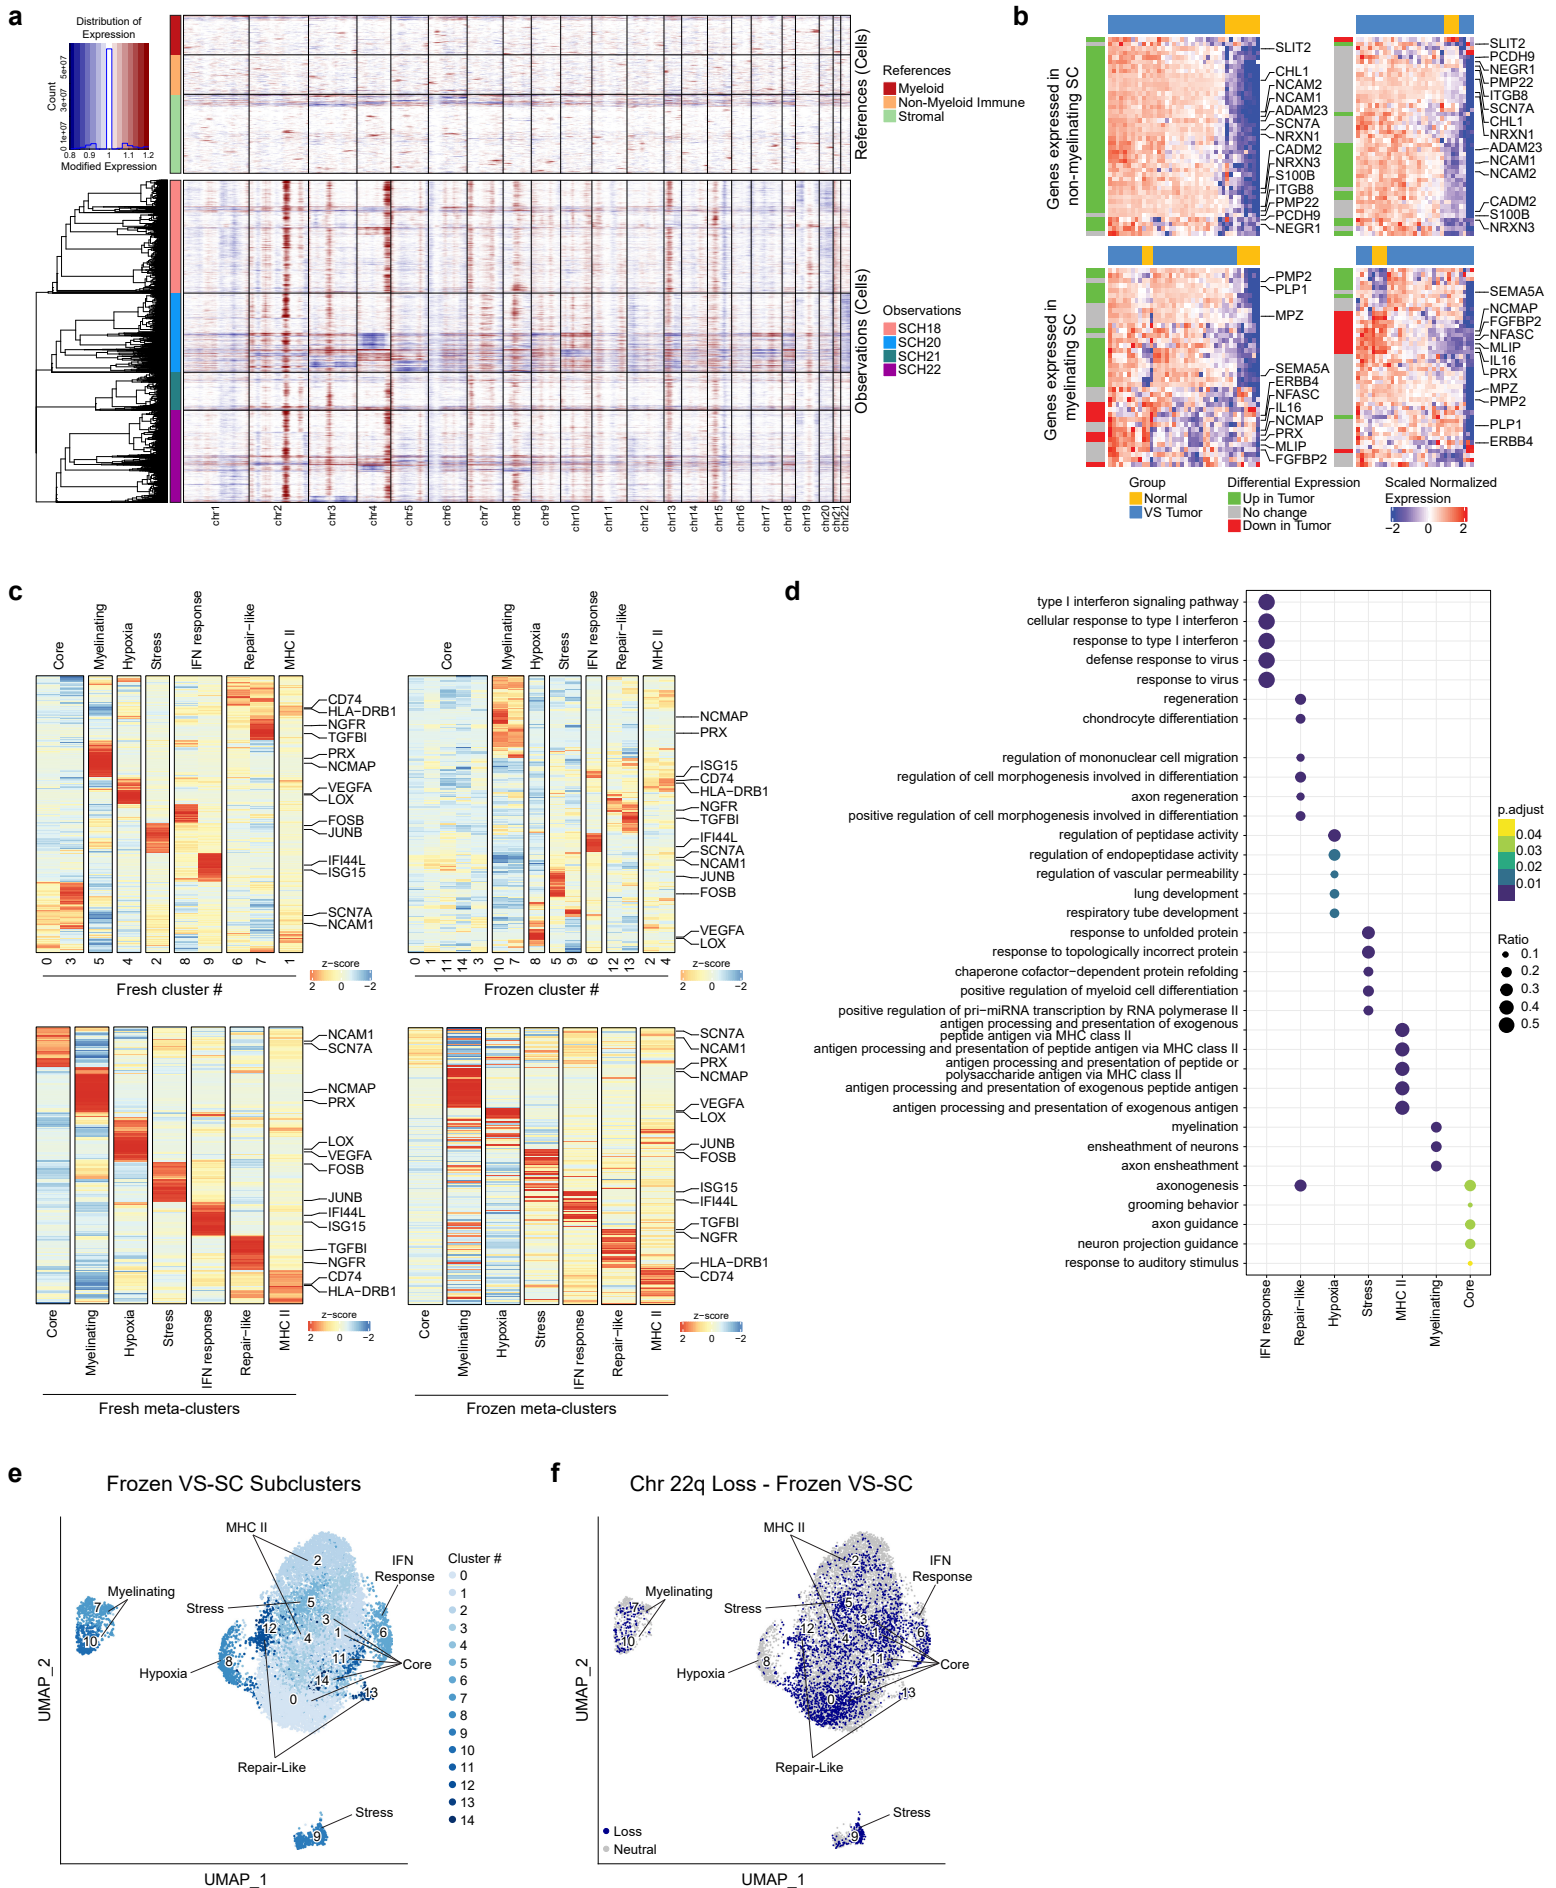

### Supplementary Figure 3. Supplementary VS-SC analysis

- a. InferCNV residual gene expression heatmap of VS-SC from frozen nuclei samples showing decreased expression of genes on chromosome 22q (chr22q), indicative of chr22q loss, in VS-SC from one tumor (SCH20). See also Fig. 2a for a heatmap of VS-SC from fresh samples that were analyzed independently and identically.
- b. Heatmaps comparing expression of top 50 differentially expressed genes (DEGs) in VS-nmSC (top) and VS-myeSC (bottom) to expression observed in microarray data of normal nerve and VS tumors (left, Torres-Martin et al. (GSE39645); right, Zhao et al. (GSE108524); see also Fig. 2c).
- c. Heatmaps showing Seurat clustering results for VS-SC subclusters (top) with hierarchical clustering of top 30 DEGs of each cluster. Bottom heatmap shows final cluster-type labels and expression of cluster-defining genes. VS-SC from fresh dissociation (left) and frozen nuclei (right) samples were analyzed independently and identically. There is strong correlation in gene expression and cluster assignment between both groups of samples.
- d. Dot plot displaying results from GO BP enrichment analysis for top 25 DEGs from each VS-SC subtype.
- e. UMAP representation of VS-SC from the frozen nuclei dataset with meta-clusters labeled. See also Fig. 2e.
- f. UMAP plot of frozen nuclei sample VS-SC highlighting cells with inferred chr22q loss. Cells with chr22q loss do not form a discrete cluster but instead cluster with cells without chr22q loss that share the same metaprogram. See also Fig. 2f.



# Supplementary Figure 4

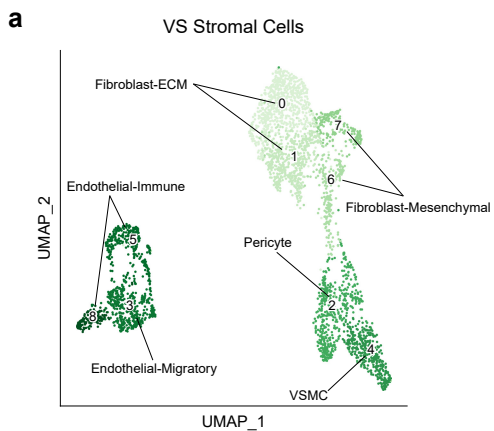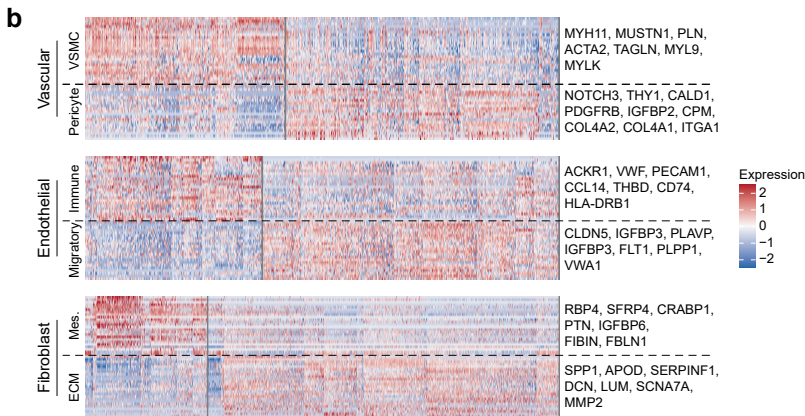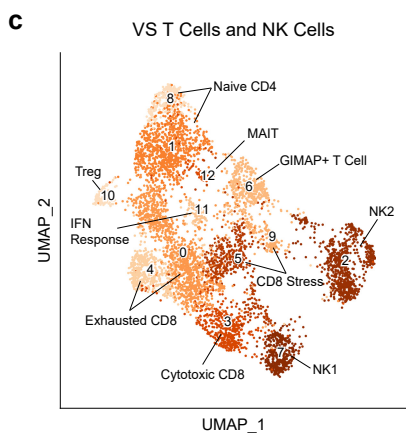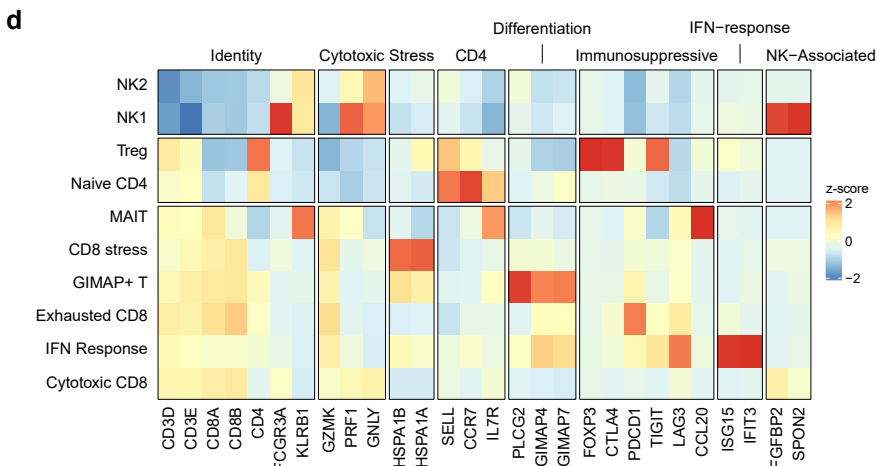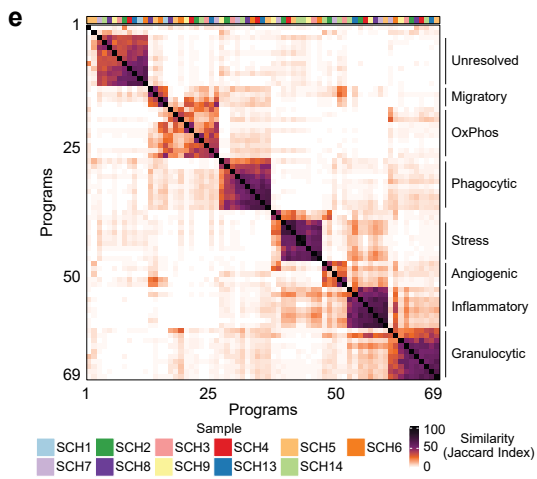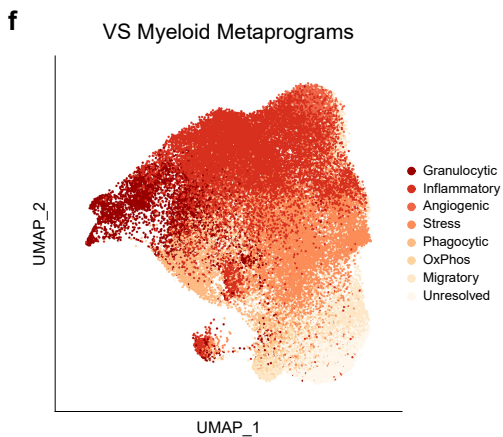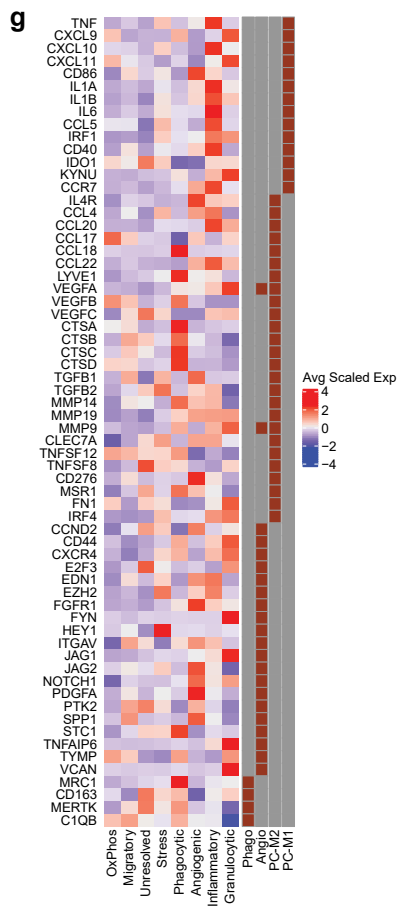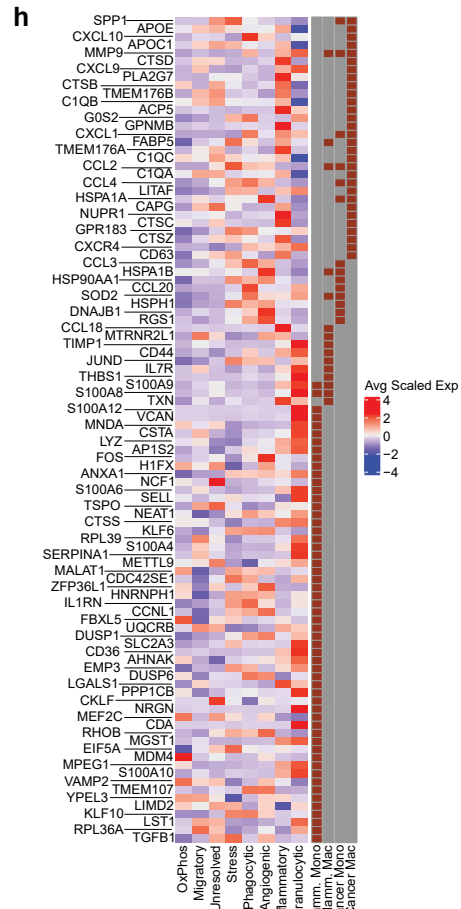

#### Supplementary Figure 4. Classification of cell states in stromal and immune cell populations.

- a. UMAP plot displaying stroma cell meta-cluster labels.
- b. Heatmap showing representative gene expression for each stromal cell meta-cluster.
- c. UMAP displaying NK and T cell meta-cluster labels.
- d. Heatmap showing average expression across meta-clusters of known marker genes for NK and T cell phenotypes.
- e. Heatmap displaying pairwise similarities between myeloid-cell programs, identified via NMF. Annotations on right designate metaprogram labels.
- f. Myeloid cells were scored for each metaprogram identified in Fig. S4e and assigned to the metaprogram for which they scored highest.
- g. Heatmap showing expression of cancer associated macrophage markers, as defined in a pan-cancer (PC) scRNA-seq analysis of tumor infiltrating macrophages<sup>41</sup>.
- h. Heatmap showing expression of monocyte/macrophage markers expressed in the setting of inflammation and cancer, as defined in pan-tissue scRNA-seq analysis of myeloid cells<sup>43</sup>.

# Supplementary Figure 5

**a**

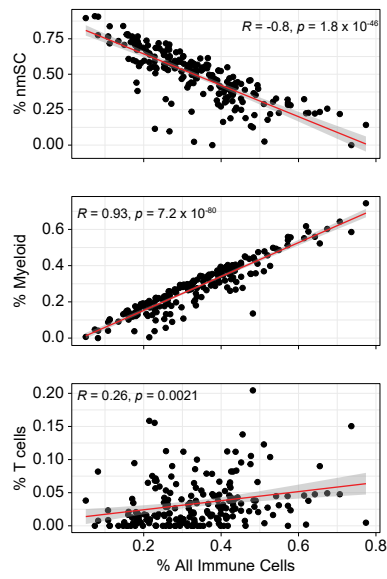

**b**

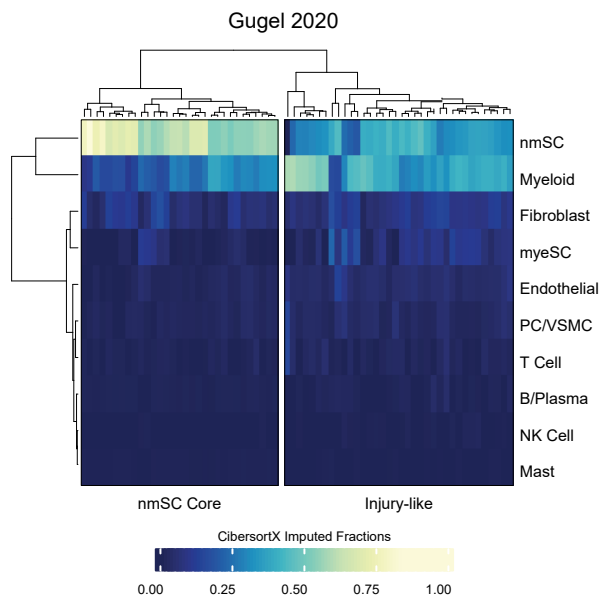

**c**

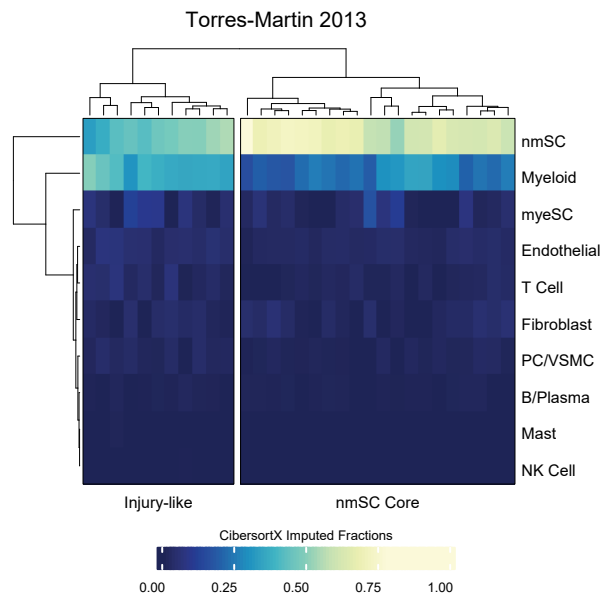

**d**

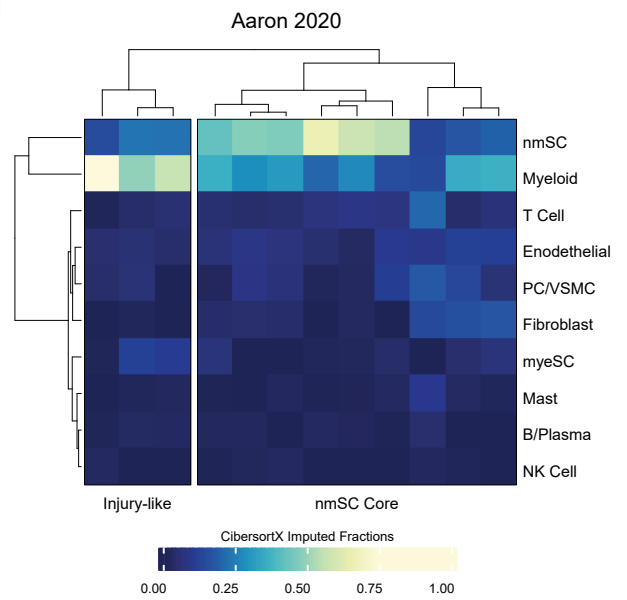

**e**

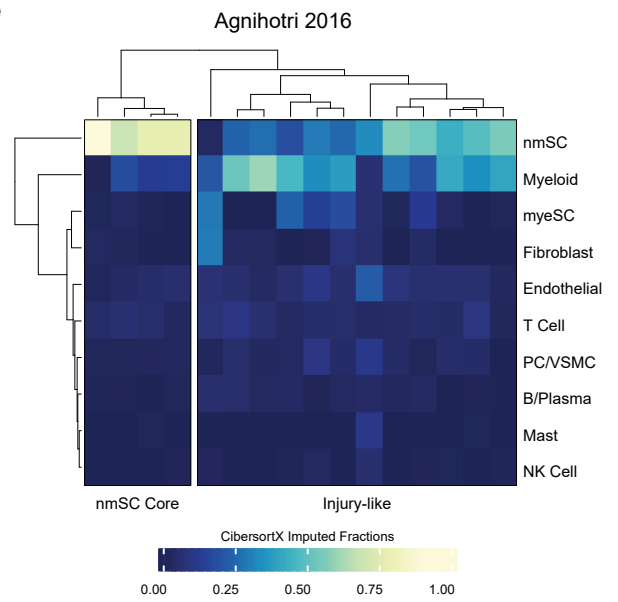

**f**

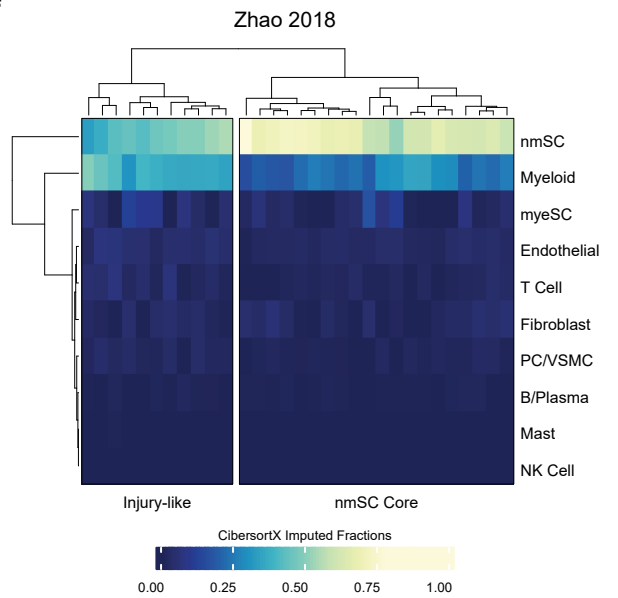

**Supplementary Figure 5. Classification of deconvolved bulk RNA expression data.**

- a. Correlation of imputed fractions of myeloid (top), T cell (middle), and nmSC (cells) with percentage of all immune cells in each deconvolved tumor sample.
- b.-f. Heatmaps displaying imputed cell fractions from CIBERSORTx deconvolution. VS tumors are classified into Injury-like and nmSC Core categories using hierarchical clustering of imputed cell fractions. PC/VSMC, pericyte/vascular smooth muscle cells; myeSC, myelinating Schwann cell; nmSC, non-myelinating Schwann cell.

# Supplementary Figure 6

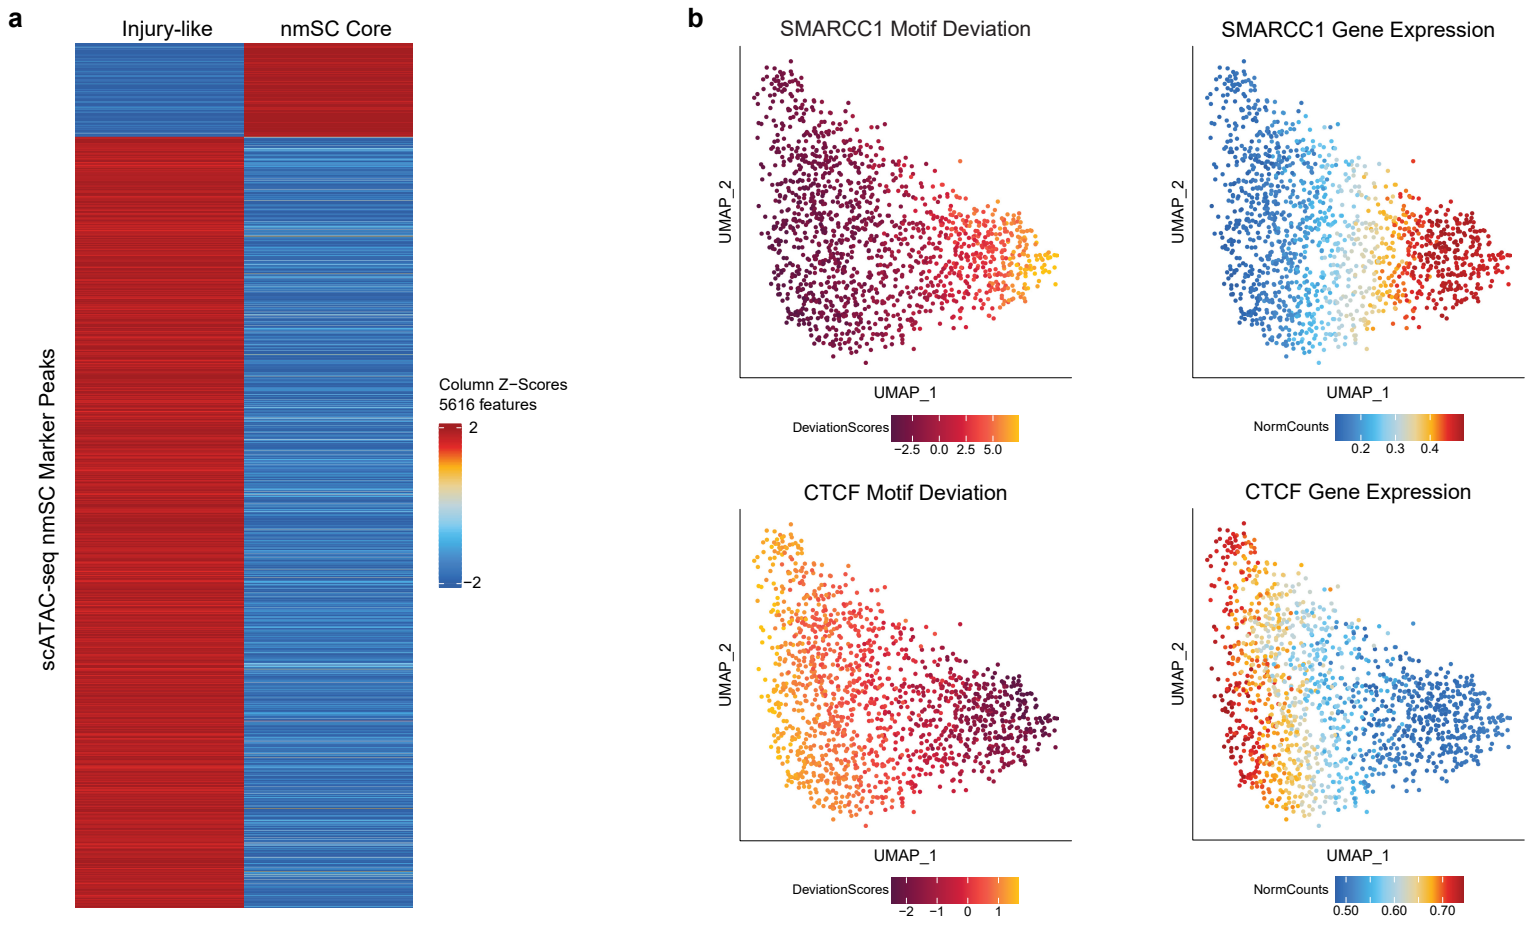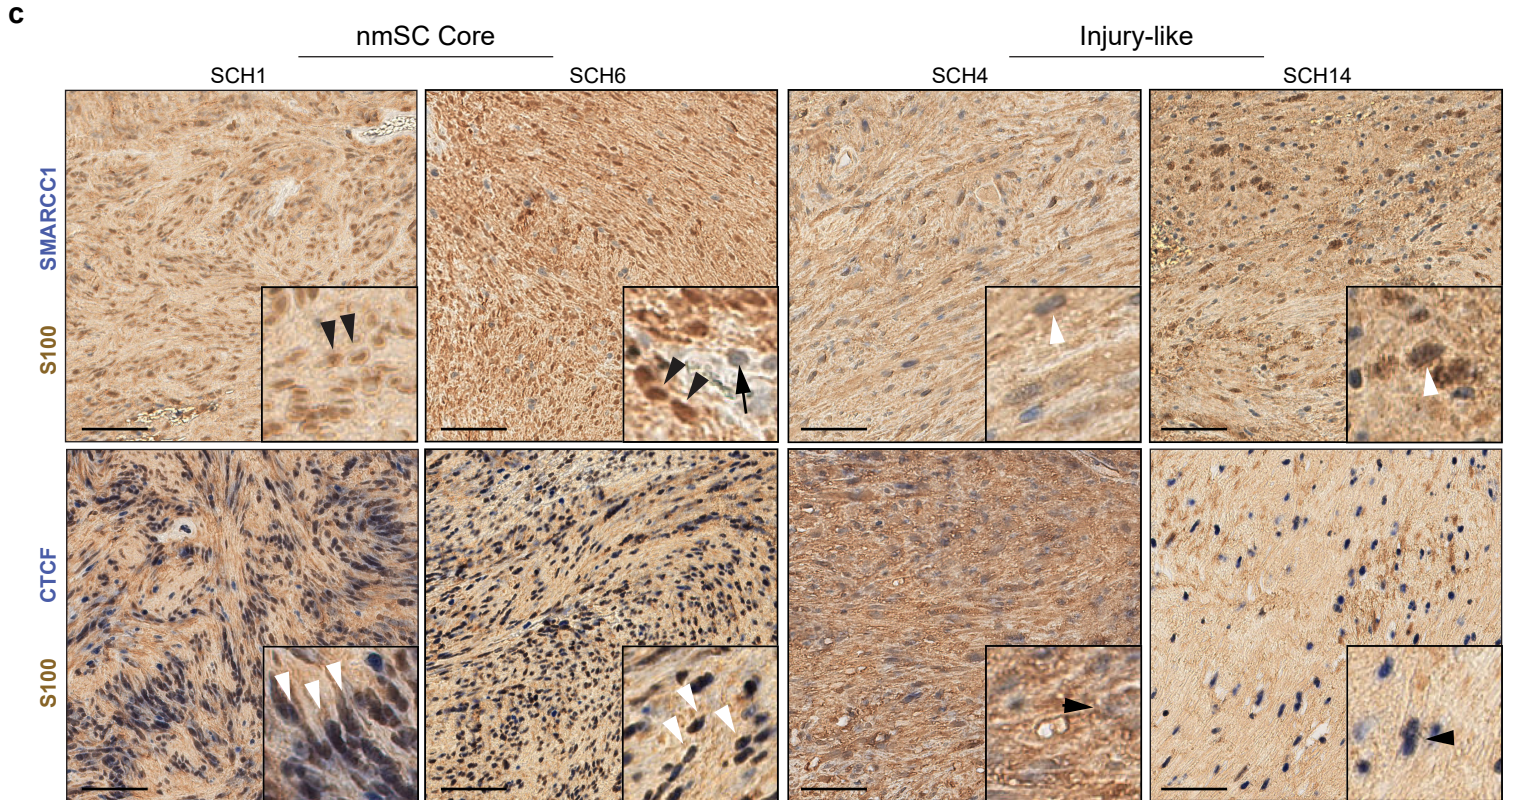

## Supplementary Figure 6. Supplemental scATAC-seq and ligand-receptor analyses.

- a. Heatmap showing differentially accessible peaks (DAPs) identified 5616 statistically significant marker peaks with  $\text{Log}_2\text{FC} \geq 2$  differentiating VS-SC in Injury-like and nmSC Core tumors.
- b. UMAP of Motif Deviation and Gene Expression of select genes specific to nmSC Core and Injury-like VS-SC.
- c. Double-stain IHC. Top: There is enrichment of S100+/SMARCC1+ cells (white arrowhead) in Injury-like tumors, whereas S100+/SMARCC1- cells (black arrowhead) and S100-/SMARCC1+ cells (black arrow) are more abundant in nmSC Core tumors. Bottom: There is enrichment in staining intensity and cell density of S100+/CTCF+ cells in nmSC Core tumors. Double positive cells are present, though staining is less intense, in Injury-like VS (black arrowhead). Scale bars = 50  $\mu\text{m}$ .

# Supplementary Figure 7

**a**

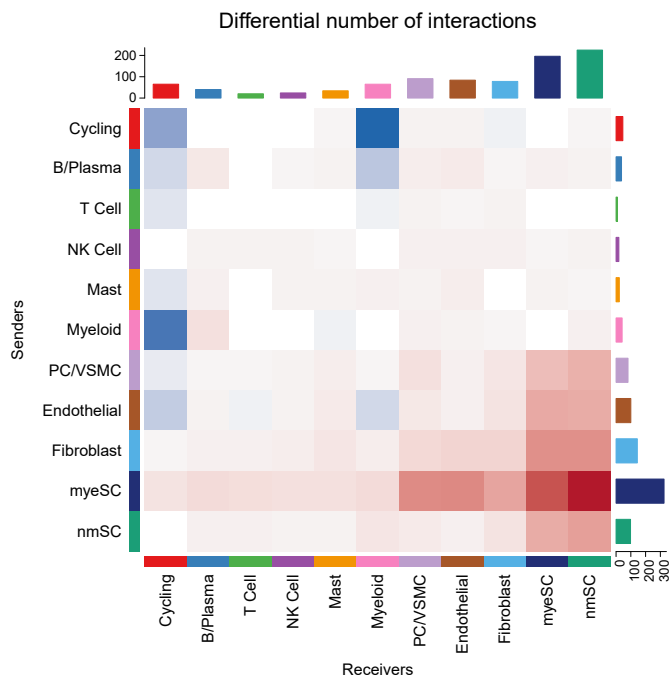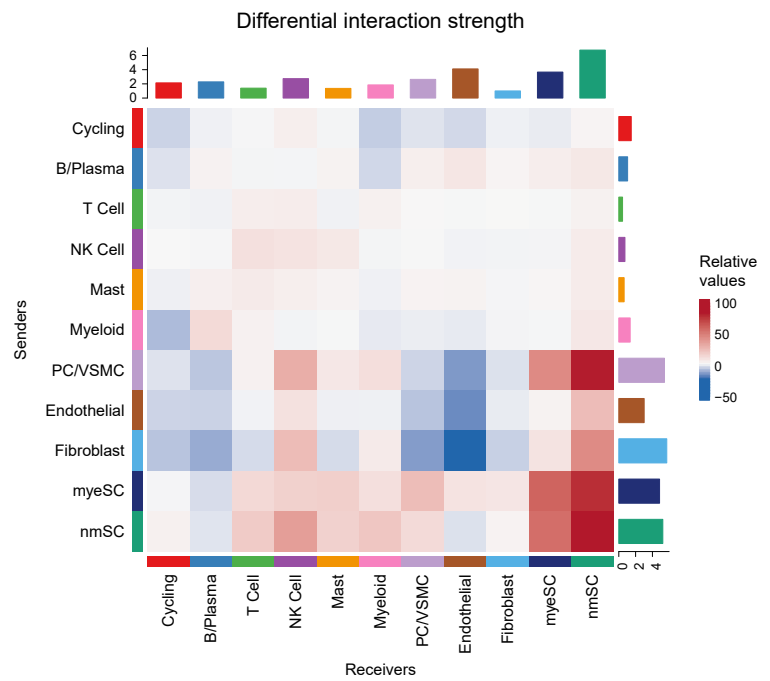

**b**

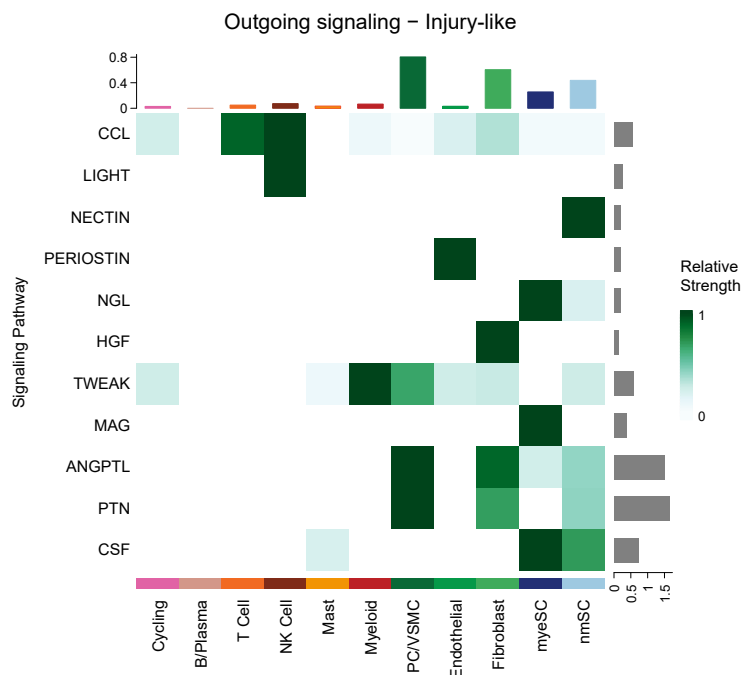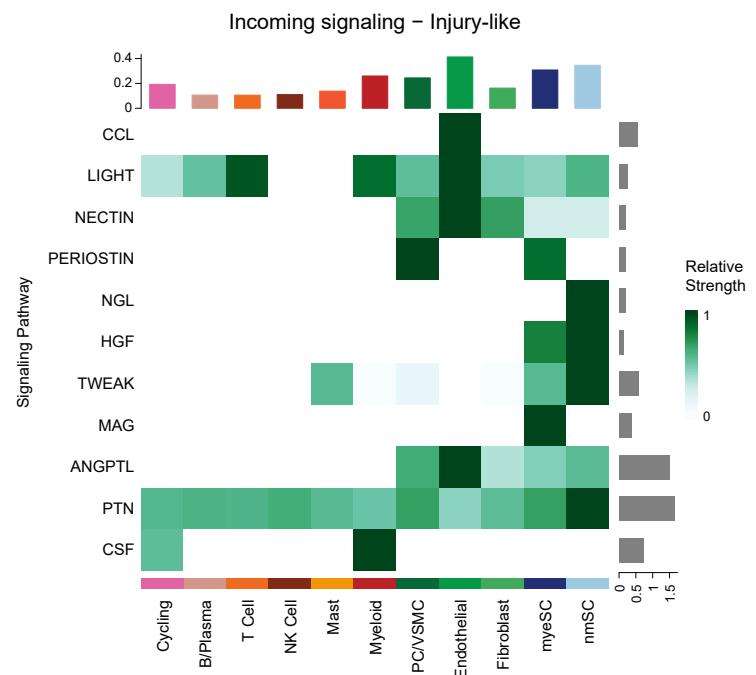

**c**

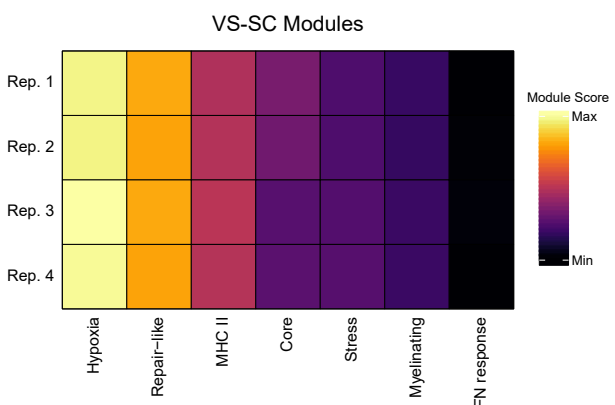

**d**

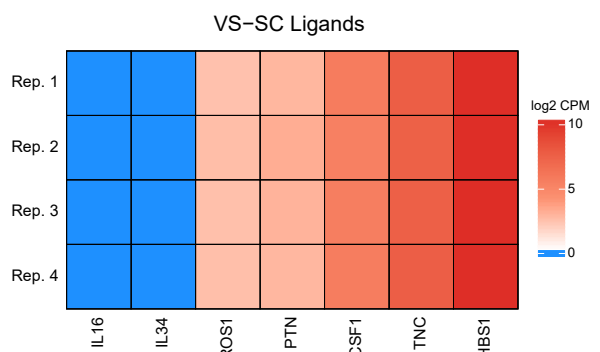

## Supplementary Figure 7. Ligand-receptor networks and characterization of HSC cell lines.

- a. Heatmap displaying the relative interaction strength of signaling pathways enriched in Injury-like VS. Top bar plots show summative contribution of individual cell types. Side bar plots show summative contribution of a given pathway to the inferred communication network.
- b. Heatmap showing differential number of interactions (left) and interaction strength (right), displayed as Injury-like VS relative to nmSC Core VS. The top bar plot represents the sum of column of values displayed (*i.e.*, incoming signals). The right bar plot represents the sum of row of values (*i.e.*, outgoing signals). Red and blue colors in the color scale represent increased and decreased signaling, respectively, in Injury-like VS nmSC Core tumors. PC/VSMC, pericyte/vascular smooth muscle cells; myeSC, myelinating Schwann cell; nmSC, non-myelinating Schwann cell.
- c. Bulk RNA-sequencing gene expression profiles obtained from two technical and two biological replicates for the HSC cell line. Scoring HSC bulk expression with the VS-SC meta-cluster gene signatures suggests that the HSC cells most resemble the Repair-like and MHC II VS-SC programs found in Injury-like VS, and less so the Core VS-SC program found in nmSC core VS.
- d. Heatmap showing log-transformed expression of candidate VS-SC ligands in HSC cells based on bulk RNA-sequencing.



Supplementary Table 1. scRNA-seq Patient Characteristics

| Subject | Technique | scATAC | Sex | Size | Consi  | Subjective_He | Previous_Treatment | Dysequilibrium | Trigem | WRS | PT50C | PT100C | PT200C | PTA    | AAO-HNS | Resection | Adherent | FN_Stim | Postop_FI | Postop_Recurrence |
|---------|-----------|--------|-----|------|--------|---------------|--------------------|----------------|--------|-----|-------|--------|--------|--------|---------|-----------|----------|---------|-----------|-------------------|
| SCH1    | scRNA     | No     | M   | 2.6  | Solid  | Yes           | No                 | Yes            | No     | 96  | 10    | 20     | 30     | 20     | A       | GTR       | No       | Yes     | Yes       | No                |
| SCH2    | scRNA     | No     | F   | 3.4  | Cystic | Yes           | No                 | Yes            | Yes    | 40  | 100   | 100    | 100    | 100    | D       | STR       | Yes      | Yes     | No        | No                |
| SCH3    | scRNA     | No     | F   | 2.5  | Cystic | Yes           | No                 | No             | No     | 0   | 100   | 100    | 100    | 100    | D       | STR       | Yes      | Yes     | No        | No                |
| SCH4    | scRNA     | Yes    | F   | 3.7  | Solid  | Yes           | No                 | No             | Yes    | 0   | 75    | 80     | 75     | 76.667 | D       | STR       | Yes      | Yes     | Yes       | Yes               |
| SCH5    | scRNA     | Yes    | M   | 2    | Solid  | Yes           | No                 | No             | No     | 4   | 60    | 55     | 85     | 70     | D       | GTR       | No       | Yes     | No        | No                |
| SCH6    | scRNA     | Yes    | M   | 3.1  | Solid  | No            | No                 | Yes            | No     | 96  | 20    | 20     | 25     | 21.667 | A       | GTR       | No       | Yes     | Yes       | No                |
| SCH7    | scRNA     | Yes    | F   | 1.3  | Solid  | Yes           | No                 | Yes            | No     | 40  | 20    | 65     | 60     | 48.333 | D       | GTR       | No       | Yes     | No        | No                |
| SCH8    | scRNA     | No     | F   | 1.4  | Solid  | Prior Tx      | Yes                | No             | No     | 0   | 100   | 100    | 100    | 100    | D       | GTR       | No       | Yes     | No        | No                |
| SCH9    | scRNA     | Yes    | M   | 0.6  | Solid  | Yes           | No                 | Yes            | No     | 0   | 100   | 100    | 100    | 100    | D       | GTR       | No       | Yes     | No        | No                |
| SCH13   | scRNA     | Yes    | F   | 3.6  | Cystic | Prior Tx      | Yes                | No             | No     | 0   | 100   | 100    | 100    | 100    | D       | STR       | Yes      | Yes     | No        | No                |
| SCH14   | scRNA     | Yes    | F   | 2.1  | Solid  | Prior Tx      | Yes                | No             | Yes    | 0   | 100   | 100    | 100    | 100    | D       | STR       | Yes      | Yes     | Yes       | No                |
| SCH18   | snRNA     | No     | M   | 1.9  | Solid  | Prior Tx      | No                 | No             | No     | 0   | 100   | 100    | 100    | 100    | D       | GTR       | Yes      | Yes     | No        | No                |
| SCH20   | snRNA     | No     | F   | 2.1  | Cystic | Yes           | No                 | No             | No     | 82  | 20    | 15     | 35     | 23.333 | A       | STR       | Yes      | Yes     | No        | No                |
| SCH21   | snRNA     | No     | M   | 3.2  | Cystic | Yes           | No                 | Yes            | Yes    | 0   | 100   | 100    | 100    | 100    | D       | STR       | Yes      | Yes     | Yes       | No                |
| SCH22   | snRNA     | No     | M   | 3.9  | Solid  | Yes           | No                 | No             | No     | 45  | 100   | 100    | 100    | 100    | D       | STR       | Yes      | Yes     | No        | No                |

**Supplementary Table 2. NF2 mutations derived from WES analysis.**

| ID    | Chr   | Start    | End      | Ref                                                          | Alt                | Gene | ExonicFunc             | VAF   | tumor_readcounts (ref, alt) | normal_readcounts (ref, alt) |
|-------|-------|----------|----------|--------------------------------------------------------------|--------------------|------|------------------------|-------|-----------------------------|------------------------------|
| SCH1  | chr22 | 29654719 | 29654719 | A                                                            | -                  | NF2  | frameshift deletion    | 0.83  | 16,78                       | 63,0                         |
| SCH1  | chr22 | 29654720 | 29654720 | A                                                            | C                  | NF2  | nonsynonymous SNV      | 0.821 | 17,78                       | 63,0                         |
| SCH3  | chr22 | 29654670 | 29654680 | ACCCAGTGTT                                                   | -                  | NF2  | frameshift deletion    | 0.137 | 170,27                      | 193,0                        |
| SCH3  | chr22 | 29671882 | 29671883 | GA                                                           | -                  | NF2  | frameshift deletion    | 0.174 | 190,40                      | 355,3                        |
| SCH4  | chr22 | 29655642 | 29655649 | ACTGCTTG                                                     | -                  | NF2  | frameshift deletion    | 0.124 | 113,16                      | 155,1                        |
| SCH4  | chr22 | 29674841 | 29674847 | AAGAGGC                                                      | -                  | NF2  | frameshift deletion    | 0.061 | 46,3                        | 89,1                         |
| SCH5  | chr22 | 29655678 | 29655678 | T                                                            | A                  | NF2  | nan                    | 0.359 | 25,14                       | 77,0                         |
| SCH5  | chr22 | 29678276 | 29678276 | C                                                            | -                  | NF2  | frameshift deletion    | 0.383 | 29,18                       | 129,0                        |
| SCH6  | chr22 | 29636789 | 29636789 | C                                                            | A                  | NF2  | stopgain               | 0.34  | 198,102                     | 360,0                        |
| SCH6  | chr22 | 29654669 | 29654669 | G                                                            | -                  | NF2  | frameshift deletion    | 0.371 | 78,46                       | 215,0                        |
| SCH8  | chr22 | 29654667 | 29654667 | -                                                            | CGACCCAGTGTTCACAAG | NF2  | frameshift insertion   | 0.365 | 132,76                      | 150,1                        |
| SCH8  | chr22 | 29655669 | 29655669 | C                                                            | T                  | NF2  | stopgain               | 0.275 | 148,56                      | 132,0                        |
| SCH13 | chr22 | 29661339 | 29661339 | G                                                            | A                  | NF2  | synonymous SNV         | 0.336 | 223,113                     | 418,2                        |
| SCH14 | chr22 | 29678250 | 29678250 | A                                                            | -                  | NF2  | frameshift deletion    | 0.233 | 198,60                      | 364,2                        |
| SCH18 | chr22 | 29655640 | 29655640 | T                                                            | -                  | NF2  | frameshift deletion    | 0.262 | 169,60                      | 177,0                        |
| SCH18 | chr22 | 29655643 | 29655643 | C                                                            | T                  | NF2  | nonsynonymous SNV      | 0.261 | 173,61                      | 180,0                        |
| SCH20 | chr22 | 29654649 | 29654663 | CTTCCAGTATGGTG                                               | -                  | NF2  | frameshift deletion    | 0.283 | 66,26                       | 127,2                        |
| SCH21 | chr22 | 29673473 | 29673473 | G                                                            | T                  | NF2  | stopgain               | 0.417 | 77,55                       | 403,0                        |
| SCH22 | chr22 | 29642263 | 29642265 | CTT                                                          | -                  | NF2  | nonframeshift deletion | 0.352 | 35,19                       | 212,1                        |
| SCH22 | chr22 | 29642270 | 29642285 | CGCGTCCAGGCAAG                                               | -                  | NF2  | frameshift deletion    | 0.358 | 34,19                       | 209,0                        |
| SCH22 | chr22 | 29671910 | 29671972 | CAGATGAAAGAAAGCAACAATGGCCAACGAAGCACTGGTGATTCTGAGGGGCTGGGGTTC | -                  | NF2  | nonframeshift deletion | 0.159 | 243,46                      | 473,0                        |

**Supplementary Table 3. Number of cells of each cell type with/without chromosome 22q loss from all samples predicted to have chr22q loss by inferCNV and/or WES (SCH1, SCH2, SCH13, SCH20).**

| Cell type   | Num. Chr22q Neutral | Num. Chr22q Loss | % Chr22q Loss |
|-------------|---------------------|------------------|---------------|
| Mucosa      | 0                   | 0                | na            |
| Cycling     | 316                 | 0                | 0.00%         |
| BC          | 101                 | 0                | 0.00%         |
| TC          | 2577                | 0                | 0.00%         |
| NKC         | 718                 | 0                | 0.00%         |
| Mast        | 31                  | 0                | 0.00%         |
| Myeloid     | 23485               | 6                | 0.03%         |
| PC_VSMC     | 317                 | 0                | 0.00%         |
| Endothelial | 281                 | 0                | 0.00%         |
| Fibroblast  | 1126                | 0                | 0.00%         |
| myeSC       | 0                   | 209              | 100.00%       |
| nmSC        | 0                   | 5174             | 100.00%       |

**Supplementary Table 4. Number of cells of each Schwann cell subtype with/without chromosome 22q loss from all scRNA samples.**

| Cell subtype | Num. Chr22q Neutral | Num. Chr22q Loss | % Chr22q Loss |
|--------------|---------------------|------------------|---------------|
| Core         | 1547                | 711              | 31.49%        |
| MHC II       | 887                 | 555              | 38.49%        |
| Stress       | 974                 | 381              | 28.12%        |
| Hypoxia      | 348                 | 55               | 13.65%        |
| Myelinating  | 326                 | 27               | 7.65%         |
| Repair-like  | 329                 | 253              | 43.47%        |
| IFN response | 262                 | 37               | 12.37%        |
| All subtypes | 4673                | 2019             | 30.17%        |

**Supplementary Table 5. Bulk RNA-seq patient characteristics**

| ID        | Sex | Side  | HL | Tini | Vertigo | Size | NF2 | Recur | Prior_Sx | Prior_SRS | Postop_SRS | EOR | Postop_Recur |
|-----------|-----|-------|----|------|---------|------|-----|-------|----------|-----------|------------|-----|--------------|
| 15-04-001 | M   | Right | Y  | N    | N       | 3.17 | N   | Y     | Y        | N         | N          | GTR | N            |
| 17-04-006 | M   | Left  | Y  | Y    | N       | 4.11 | Y   | N     | N        | Y         | N          | STR | N            |
| 17-04-007 | F   | Left  | Y  | Y    | N       | 1.55 | N   | N     | N        | N         | N          | GTR | N            |
| 19-04-001 | F   | Left  | N  | Y    | N       | 2.45 | N   | N     | N        | N         | N          | GTR | N            |
| 19-04-002 | F   | Left  | Y  | N    | N       | 2.59 | N   | Y     | Y        | N         | Y          | STR | Y            |
| 19-04-003 | M   | Right | Y  | N    | N       | 3.74 | N   | N     | N        | N         | N          | GTR | N            |
| 19-04-004 | F   | Left  | Y  | N    | N       | 3.09 | N   | N     | N        | N         | N          | STR | N            |
| 19-04-005 | F   | Right | Y  | Y    | Y       | 2.87 | N   | N     | N        | N         | N          | GTR | N            |
| 19-04-007 | F   | Left  | Y  | N    | N       | 1.82 | N   | N     | N        | N         | N          | STR | N            |
| 19-04-008 | F   | Right | Y  | Y    | Y       | 1.25 | N   | N     | N        | N         | N          | GTR | N            |
| 19-04-009 | M   | Right | Y  | N    | Y       | 4.62 | N   | N     | N        | N         | N          | STR | Y            |
| 19-04-010 | F   | Left  | Y  | Y    | N       | 1.98 | N   | N     | N        | N         | N          | GTR | N            |
| 20-04-001 | F   | Right | Y  | N    | N       | 3.41 | N   | N     | N        | N         | N          | GTR | N            |
| 20-04-002 | M   | Left  | Y  | Y    | Y       | 1.44 | N   | N     | N        | N         | N          | GTR | N            |
| 20-04-005 | M   | Right | Y  | Y    | Y       | 1.63 | N   | N     | N        | N         | N          | GTR | N            |
| 20-04-008 | F   | Left  | Y  | Y    | N       | 1.23 | N   | N     | N        | N         | N          | GTR | N            |
| 21-04-001 | F   | Left  | Y  | Y    | N       | 2.68 | N   | N     | N        | N         | N          | GTR | N            |
| 21-04-002 | F   | Left  | Y  | Y    | N       | 1.23 | N   | N     | N        | N         | N          | GTR | N            |
| 21-04-003 | F   | Right | Y  | Y    | N       | 2.96 | N   | N     | N        | N         | N          | GTR | N            |
| 21-04-004 | F   | Left  | Y  | N    | Y       | 1.63 | N   | N     | N        | N         | N          | GTR | N            |
| 21-04-005 | F   | Right | Y  | N    | N       | 2.47 | N   | N     | N        | N         | N          | STR | N            |
| 21-04-006 | M   | Left  | N  | Y    | Y       | 2.85 | N   | N     | N        | N         | N          | GTR | N            |

**Supplementary Table 6. CellBender Parameters**

| Sample | Expected Cells | Total Droplets | Low Count Threshold | FPR  | Epochs | Learning Rate | Z-dims | Z-layers | Model | Training Fraction |
|--------|----------------|----------------|---------------------|------|--------|---------------|--------|----------|-------|-------------------|
| SCH1   | 7000           | 800000         | 25                  | 0.01 | 150    | 0.000001      | 100    | 500      | Full  | 0.9               |
| SCH2   | 8000           | 800000         | 15                  | 0.01 | 150    | 0.000002      | 100    | 500      | Full  | 0.9               |
| SCH3   | 2500           | 800000         | 10                  | 0.01 | 150    | 0.000001      | 200    | 1000     | Full  | 0.9               |
| SCH4   | 5000           | 800000         | 25                  | 0.01 | 150    | 0.000001      | 100    | 500      | Full  | 0.9               |
| SCH5   | 5000           | 800000         | 15                  | 0.01 | 150    | 0.000001      | 100    | 500      | Full  | 0.9               |
| SCH6   | 7000           | 800000         | 10                  | 0.01 | 150    | 0.000001      | 200    | 500      | Full  | 0.9               |
| SCH7   | 4000           | 800000         | 10                  | 0.01 | 150    | 0.000002      | 100    | 500      | Full  | 0.9               |
| SCH8   | 8000           | 600000         | 10                  | 0.01 | 150    | 0.000001      | 100    | 500      | Full  | 0.9               |
| SCH9   | 5000           | 700000         | 5                   | 0.01 | 150    | 0.0000005     | 150    | 1000     | Full  | 0.9               |
| SCH13  | 10000          | 900000         | 10                  | 0.01 | 150    | 0.000001      | 100    | 500      | Full  | 0.9               |
| SCH14  | 9000           | 500000         | 5                   | 0.01 | 150    | 0.000002      | 100    | 500      | Full  | 0.9               |
| SCH20  | 18000          | 750000         | 10                  | 0.01 | 150    | 0.000001      | 100    | 500      | full  | 0.9               |
| SCH21  | 18000          | 900000         | 10                  | 0.01 | 150    | 0.0000005     | 100    | 500      | full  | 0.9               |
| SCH22  | 20000          | 900000         | 10                  | 0.01 | 150    | 0.0000005     | 100    | 500      | full  | 0.9               |
